# Supplementary material for: Time- and Dose-Dependent Effects of Dietary Deoxynivalenol (DON) in Rainbow Trout (Oncorhynchus mykiss) at Organism and Tissue Level
Source: MDPI journal article supplement (doi:10.3390/toxins14110810), 2022-11-20
Supplement: s1 [file s1]

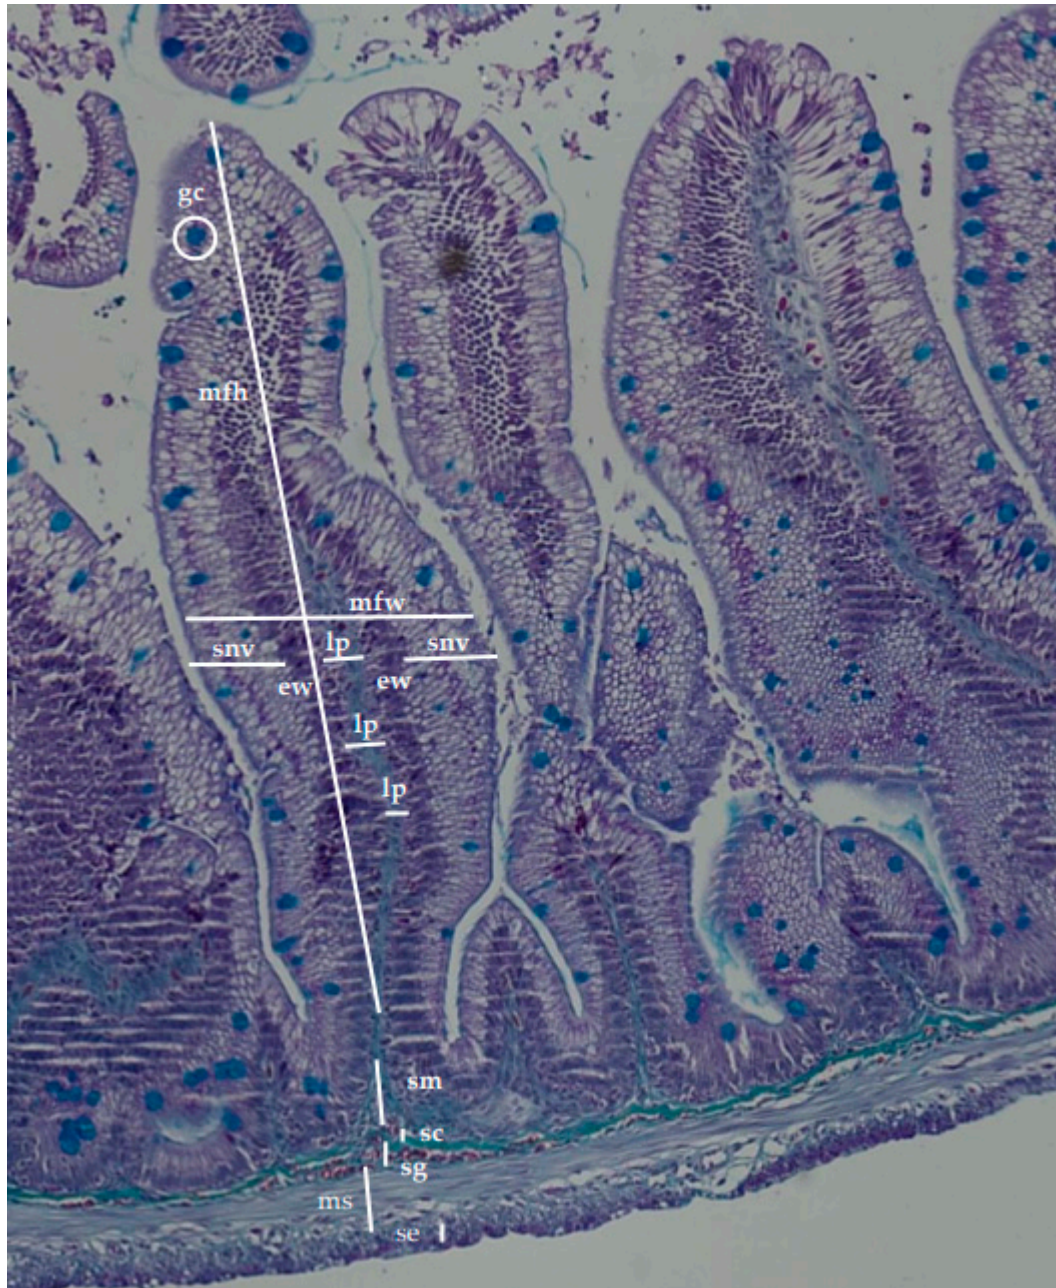

**Figure S2.** Parameters in the gastrointestinal tract used for the quantitative histopathological assessment: **se**; serosa, **ms**; muscularis, **sg**; stratum granulosum height, **sc**; stratum compactum height, **sm**; thickness of sub-epithelium mucosa, **lp**; lamina propria width, **ew**; enterocytes width, **snv**; supranuclear vacuoles width, **mfw**; mucosal fold width, **mfh**; mucosal fold height, **gc**; goblet cell.
