# Supplementary material for: Time- and Dose-Dependent Effects of Dietary Deoxynivalenol (DON) in Rainbow Trout (Oncorhynchus mykiss) at Organism and Tissue Level
Source: MDPI journal article supplement (doi:10.3390/toxins14110810), 2022-11-20
Supplement: s1 [file s1]

**Table S1.** Least square means and SEM of histological parameters in pyloric caeca, midgut and hindgut of rainbow trout after feeding restrictively for 6 days (week 1) and 40 days (week 6) and *ad libitum* for 15 days (week 8) the experimental diets; control (CON) , natural (ND2) and pure DON high (PD2).

| Experimental diets                      |      |                      |                      |                       | p-value |      |      |           | R <sup>2</sup> |
|-----------------------------------------|------|----------------------|----------------------|-----------------------|---------|------|------|-----------|----------------|
|                                         | Week | CON                  | ND2                  | PD2                   | SEM     | diet | time | diet*time |                |
| Thickness of sub-epithelium mucosa (µm) |      |                      |                      |                       |         |      |      |           |                |
| Pyloric                                 | 1    | 47.28                | 57.95                | 47.85                 |         |      |      |           |                |
|                                         | 6    | 46.74                | 49.59                | 59.06                 | 5.03    | NS   | NS   | NS        | 0.21           |
|                                         | 8    | 62.53                | 57.29                | 53.32                 |         |      |      |           |                |
| Midgut                                  | 1    | 42.38                | 54.23                | 46.65                 |         |      |      |           |                |
|                                         | 6    | 48.03                | 53.92                | 53.39                 | 4.94    | NS   | NS   | NS        | 0.16           |
|                                         | 8    | 52.63                | 54.98                | 57.95                 |         |      |      |           |                |
| Hindgut                                 | 1    | 47.67 <sup>ab</sup>  | 54.54 <sup>ab</sup>  | 47.10 <sup>ab</sup>   |         |      |      |           |                |
|                                         | 6    | 44.65 <sup>a</sup>   | 52.91 <sup>ab</sup>  | 54.61 <sup>ab</sup>   | 4.15    | NS   | *    | NS        | 0.33           |
|                                         | 8    | 64.07 <sup>b</sup>   | 62.41 <sup>ab</sup>  | 51.58 <sup>ab</sup>   |         |      |      |           |                |
| Mucosal fold width (µm)                 |      |                      |                      |                       |         |      |      |           |                |
| Pyloric <sup>#</sup>                    | 1    | 131.90 <sup>ab</sup> | 128.91 <sup>ab</sup> | 108.39 <sup>a</sup>   |         |      |      |           |                |
|                                         | 6    | 125.70 <sup>a</sup>  | 132.19 <sup>ab</sup> | 133.99 <sup>ab</sup>  | 8.64    | NS   | ***  | NS        | 0.59           |
|                                         | 8    | 177.07 <sup>c</sup>  | 168.87 <sup>bc</sup> | 166.30 <sup>bc</sup>  |         |      |      |           |                |
| Midgut                                  | 1    | 130.85 <sup>ab</sup> | 124.97 <sup>ab</sup> | 102.18 <sup>a</sup>   |         |      |      |           |                |
|                                         | 6    | 122.61 <sup>ab</sup> | 113.61 <sup>ab</sup> | 125.37 <sup>ab</sup>  | 8.77    | NS   | ***  | NS        | 0.40           |
|                                         | 8    | 142.72 <sup>b</sup>  | 149.37 <sup>b</sup>  | 151.10 <sup>b</sup>   |         |      |      |           |                |
| Hindgut <sup>#</sup>                    | 1    | 160.52 <sup>ab</sup> | 150.16 <sup>ab</sup> | 128.18 <sup>a</sup>   |         |      |      |           |                |
|                                         | 6    | 141.14 <sup>ab</sup> | 135.46 <sup>ab</sup> | 153.73 <sup>ab</sup>  | 7.44    | NS   | *    | **        | 0.39           |
|                                         | 8    | 147.22 <sup>ab</sup> | 164.93 <sup>b</sup>  | 166.87 <sup>b</sup>   |         |      |      |           |                |
| Mucosal fold height (µm)                |      |                      |                      |                       |         |      |      |           |                |
| Pyloric                                 | 1    | 387.53 <sup>a</sup>  | 500.03 <sup>ab</sup> | 437.80 <sup>a</sup>   |         |      |      |           |                |
|                                         | 6    | 397.15 <sup>a</sup>  | 430.75 <sup>a</sup>  | 547.48 <sup>ab</sup>  | 50.86   | **   | NS   | **        | 0.44           |
|                                         | 8    | 387.55 <sup>a</sup>  | 705.57 <sup>b</sup>  | 446.95 <sup>a</sup>   |         |      |      |           |                |
| Midgut                                  | 1    | 338.43 <sup>a</sup>  | 364.76 <sup>ab</sup> | 382.07 <sup>ab</sup>  |         |      |      |           |                |
|                                         | 6    | 355.31 <sup>ab</sup> | 413.47 <sup>ab</sup> | 382.66 <sup>ab</sup>  | 42.76   | NS   | ***  | NS        | 0.40           |
|                                         | 8    | 517.46 <sup>ab</sup> | 514.63 <sup>ab</sup> | 540.93 <sup>b</sup>   |         |      |      |           |                |
| Hindgut                                 | 1    | 347.96 <sup>a</sup>  | 396.25 <sup>ab</sup> | 323.17 <sup>a</sup>   |         |      |      |           |                |
|                                         | 6    | 442.54 <sup>ab</sup> | 567.28 <sup>bc</sup> | 508.90 <sup>abc</sup> | 53.15   | NS   | ***  | NS        | 0.48           |
|                                         | 8    | 665.25 <sup>c</sup>  | 585.07 <sup>bc</sup> | 534.26 <sup>abc</sup> |         |      |      |           |                |
| Lamina propria width average (µm)       |      |                      |                      |                       |         |      |      |           |                |
| Pyloric <sup>#</sup>                    | 1    | 15.82 <sup>ab</sup>  | 13.60 <sup>a</sup>   | 13.02 <sup>a</sup>    |         |      |      |           |                |
|                                         | 6    | 14.70 <sup>ab</sup>  | 13.03 <sup>a</sup>   | 12.69 <sup>a</sup>    | 1.33    | NS   | ***  | NS        | 0.60           |
|                                         | 8    | 19.96 <sup>b</sup>   | 22.81 <sup>b</sup>   | 20.21 <sup>b</sup>    |         |      |      |           |                |
| Midgut                                  | 1    | 14.16 <sup>ab</sup>  | 16.50 <sup>ab</sup>  | 12.11 <sup>a</sup>    |         |      |      |           |                |
|                                         | 6    | 15.34 <sup>ab</sup>  | 12.84 <sup>a</sup>   | 17.97 <sup>ab</sup>   | 1.75    | NS   | ***  | NS        | 0.41           |
|                                         | 8    | 18.71 <sup>ab</sup>  | 20.53 <sup>b</sup>   | 21.49 <sup>b</sup>    |         |      |      |           |                |
| Hindgut <sup>#</sup>                    | 1    | 17.40 <sup>ab</sup>  | 13.55 <sup>a</sup>   | 12.32 <sup>a</sup>    |         |      |      |           |                |
|                                         | 6    | 12.88 <sup>a</sup>   | 13.29 <sup>a</sup>   | 13.47 <sup>a</sup>    | 1.66    | NS   | ***  | NS        | 0.57           |
|                                         | 8    | 21.30 <sup>b</sup>   | 20.28 <sup>b</sup>   | 23.68 <sup>b</sup>    |         |      |      |           |                |
| Stratum granulosum width (µm)           |      |                      |                      |                       |         |      |      |           |                |
| Pyloric                                 | 1    | 16.86 <sup>a</sup>   | 20.98 <sup>ab</sup>  | 21.53 <sup>ab</sup>   |         |      |      |           |                |
|                                         | 6    | 21.58 <sup>ab</sup>  | 24.05 <sup>ab</sup>  | 29.99 <sup>ab</sup>   | 3.05    | NS   | **   | NS        | 0.32           |

|                                           |                     |                     |                     |                     |       |    |     |    |      |
|-------------------------------------------|---------------------|---------------------|---------------------|---------------------|-------|----|-----|----|------|
| Midgut                                    | 8                   | 33.13 <sup>b</sup>  | 25.67 <sup>ab</sup> | 24.44 <sup>ab</sup> | 4.27  | NS | *** | NS | 0.43 |
|                                           | 1                   | 21.86 <sup>a</sup>  | 28.41 <sup>ab</sup> | 25.97 <sup>ab</sup> |       |    |     |    |      |
|                                           | 6                   | 42.13 <sup>b</sup>  | 29.20 <sup>ab</sup> | 46.46 <sup>b</sup>  |       |    |     |    |      |
| Hindgut                                   | 8                   | 43.05 <sup>b</sup>  | 33.71 <sup>ab</sup> | 40.19 <sup>ab</sup> | 3.55  | NS | *   | NS | 0.33 |
|                                           | 1                   | 22.43 <sup>a</sup>  | 26.23 <sup>ab</sup> | 24.53 <sup>ab</sup> |       |    |     |    |      |
|                                           | 6                   | 27.58 <sup>ab</sup> | 23.28 <sup>a</sup>  | 28.41 <sup>ab</sup> |       |    |     |    |      |
| 8                                         | 34.58 <sup>ab</sup> | 39.32 <sup>b</sup>  | 23.96 <sup>ab</sup> |                     |       |    |     |    |      |
| Enterocytes width (μm)                    |                     |                     |                     |                     |       |    |     |    |      |
| Pyloric <sup>#</sup>                      | 1                   | 62.13 <sup>a</sup>  | 64.25 <sup>ab</sup> | 50.94 <sup>a</sup>  | 5.41  | NS | *** | NS | 0.53 |
|                                           | 6                   | 58.25 <sup>a</sup>  | 64.06 <sup>ab</sup> | 67.61 <sup>ab</sup> |       |    |     |    |      |
|                                           | 8                   | 86.50 <sup>b</sup>  | 85.58 <sup>b</sup>  | 82.97 <sup>b</sup>  |       |    |     |    |      |
| Midgut                                    | 1                   | 58.99               | 60.55               | 51.14               | 5.54  | NS | **  | NS | 0.28 |
|                                           | 6                   | 57.79               | 53.68               | 58.90               |       |    |     |    |      |
|                                           | 8                   | 64.40               | 74.14               | 72.84               |       |    |     |    |      |
| Hindgut <sup>#</sup>                      | 1                   | 54.91 <sup>ab</sup> | 55.93 <sup>ab</sup> | 44.96 <sup>a</sup>  | 3.82  | NS | *** | *  | 0.43 |
|                                           | 6                   | 45.07 <sup>a</sup>  | 38.95 <sup>a</sup>  | 44.45 <sup>ab</sup> |       |    |     |    |      |
|                                           | 8                   | 52.57 <sup>ab</sup> | 54.01 <sup>ab</sup> | 62.51 <sup>b</sup>  |       |    |     |    |      |
| Muscularis width (μm)                     |                     |                     |                     |                     |       |    |     |    |      |
| Pyloric                                   | 1                   | 28.23               | 35.66               | 28.66               | 7.27  | NS | NS  | NS | 0.19 |
|                                           | 6                   | 37.44               | 46.60               | 43.51               |       |    |     |    |      |
|                                           | 8                   | 52.74               | 39.04               | 38.88               |       |    |     |    |      |
| Midgut                                    | 1                   | 38.92 <sup>a</sup>  | 51.66 <sup>ab</sup> | 42.03 <sup>ab</sup> | 10.61 | NS | *** | NS | 0.37 |
|                                           | 6                   | 81.20 <sup>ab</sup> | 59.34 <sup>ab</sup> | 79.08 <sup>ab</sup> |       |    |     |    |      |
|                                           | 8                   | 67.17 <sup>ab</sup> | 87.08 <sup>b</sup>  | 85.46 <sup>ab</sup> |       |    |     |    |      |
| Hindgut                                   | 1                   | 47.81 <sup>a</sup>  | 55.11 <sup>ab</sup> | 42.25 <sup>a</sup>  | 15.37 | NS | *   | NS | 0.32 |
|                                           | 6                   | 59.67 <sup>ab</sup> | 40.80 <sup>a</sup>  | 48.45 <sup>ab</sup> |       |    |     |    |      |
|                                           | 8                   | 62.33 <sup>ab</sup> | 119.13 <sup>b</sup> | 48.38 <sup>a</sup>  |       |    |     |    |      |
| Goblet cells density (per μm fold height) |                     |                     |                     |                     |       |    |     |    |      |
| Pyloric                                   | 1                   | 0.055               | 0.042               | 0.035               | 0.008 | NS | NS  | NS | 0.12 |
|                                           | 6                   | 0.046               | 0.043               | 0.040               |       |    |     |    |      |
|                                           | 8                   | 0.042               | 0.055               | 0.046               |       |    |     |    |      |
| Midgut                                    | 1                   | 0.076 <sup>ab</sup> | 0.058 <sup>a</sup>  | 0.072 <sup>ab</sup> | 0.009 | NS | *** | NS | 0.39 |
|                                           | 6                   | 0.10 <sup>b</sup>   | 0.083 <sup>ab</sup> | 0.083 <sup>ab</sup> |       |    |     |    |      |
|                                           | 8                   | 0.06 <sup>a</sup>   | 0.066 <sup>ab</sup> | 0.048 <sup>a</sup>  |       |    |     |    |      |
| Hindgut                                   | 1                   | 0.059               | 0.047               | 0.048               | 0.009 | NS | NS  | NS | 0.17 |
|                                           | 6                   | 0.058               | 0.037               | 0.040               |       |    |     |    |      |
|                                           | 8                   | 0.035               | 0.054               | 0.034               |       |    |     |    |      |

Standard error of means: SEM (n=52), Not significant: NS,  $p \leq 0.05$ : \*,  $p \leq 0.01$ : \*\*,  $p \leq 0.001$ : \*\*\*  
Per parameter and gut part, different superscripts (a, b, c) show significant differences ( $p \leq 0.05$ ) according to Tukeys' multiple comparison test between all combinations of diet and time ; #n=51
