# Supplementary material for: Time- and Dose-Dependent Effects of Dietary Deoxynivalenol (DON) in Rainbow Trout (Oncorhynchus mykiss) at Organism and Tissue Level
Source: Toxins (Basel). 2022 Nov 20;14(11):810. doi: 10.3390/toxins14110810 (PMC9697072; doi:10.3390/toxins14110810)
Supplement: Supplementary file 1 [file toxins-14-00810-s001.zip]

Archive with 4 entries (4 files):
- toxins-2008302-Figure S1.pdf
- toxins-2008302-Figure S2.pdf
- toxins-2008302-Table S1.pdf
- toxins-2008302-Table S2.xlsx
