# Supplementary material for: Time- and Dose-Dependent Effects of Dietary Deoxynivalenol (DON) in Rainbow Trout (Oncorhynchus mykiss) at Organism and Tissue Level
Source: Toxins (Basel). 2022 Nov 20;14(11):810. doi: 10.3390/toxins14110810 (PMC9697072; doi:10.3390/toxins14110810)
Supplement: Supplementary file 1 [file toxins-14-00810-s001.zip › toxins-2008302-Table S2.xlsx]

## Sheet: EDI
Author	Year	Species	Toxin	Experimental set-up	Exposure time (days)	Contamination source	Application mode	Doses (μg/kg)	Replicates per dose	Number of animals per dose	Age	Initial Body weight (g)	Final Body weight (g)	Average BW (g)	Feeding strategy	Feeding frequency (times/day)	Feeding level	Total Feed intake (g)	Mean Daily Feed intake (g/fish)	Estimated daily DON intake (EDI) μg/gBW/day	Journal	Publication title
Bernhoft et al.2017	2017	Atlantic salmon (Salmo salar)	DON	in-vivo	56	Pure	Feed	6000	2	50	Post-smolt (12 months)	58.8	80.2	69.5	Satiation	3	slight excess of the expected voluntary feed intake	2408	0.86	0.0742446	Food Additives and Contaminants - Part A Chemistry, Analysis, Control, Exposure and Risk Assessment	Tissue distribution and elimination of deoxynivalenol and ochratoxin A in dietary-exposed Atlantic salmon (Salmo salar)
Hooft et al.2011	2011	Rainbow trout (Oncorhynchus mykiss)	DON	in-vivo	56	Natural	Feed	2600	3	36	Juveniles	24	62.9	43.45	Satiation	3	Satiation	1569.6	0.778571	0.0465889	Aquaculture	Rainbow trout (Oncorhynchus mykiss) is extremely sensitive to the feed-borne Fusarium mycotoxin deoxynivalenol (DON)
Hooft et al.2017	2017	Rainbow trout (Oncorhynchus mykiss)	DON	in-vivo	84	Natural	Feed	2000	3	150	Fingerlings	1.8	19.7	10.75	Satiation	3	Satiation	2490	0.197619	0.0367663	Aquaculture	Evaluation of the efficacy of a commercial feed additive against the adverse effects of feed-borne deoxynivalenol (DON) on the performance of rainbow trout (Oncorhynchus mykiss)
Hooft et al.2019a	2019	Rainbow trout (Oncorhynchus mykiss)	DON	in-vivo	56	Natural	Feed	5900	3	54	Juveniles	50.3	84.3	67.3	Satiation	3	Satiation	2197.8	0.726786	0.0637152	Aquaculture	The effects of naturally occurring or purified deoxynivalenol (DON) on growth performance, nutrient utilization and histopathology of rainbow trout (Oncorhynchus mykiss)
Hooft et al.2019b	2019	Rainbow trout (Oncorhynchus mykiss)	DON	in-vivo	70	Natural	Feed -high starch (24%)	1300	3	75	Juveniles	21.9	79.4	50.65	Satiation	3	Satiation	6915	1.31714	0.0338062	Aquaculture	A comparative investigation of the effects of feed-borne deoxynivalenol (DON) on growth performance, nutrient utilization and metabolism of detoxification in rainbow trout (Oncorhynchus mykiss) and Nile tilapia (Oreochromis niloticus) fed diets containing different levels of digestible carbohydrates
Gonçalves et al.2018	2018	Rainbow trout (Oncorhynchus mykiss)	DON	in-vivo	60	Pure	Feed	11412	4	200	Fingerlings	2.52	5.96	4.24	Satiation	3	Satiation	843.76	0.0703133	0.189249	Aquaculture	Impact of deoxynivalenol on rainbow trout: Growth performance, digestibility, key gene expression regulation and metabolism
Ryerse et al.2015	2015	Rainbow trout (Oncorhynchus mykiss)	DON	in-vivo	28	Pure	Feed	3800	3	105	Juveniles	103.2	159.7	131.45	Satiation	2	Satiation	5838	1.98571	0.0574037	Jounal of Fish Diseases	Purified deoxynivalenol or feed restriction reduces mortality in rainbow trout, Oncorhynchus mykiss (Walbaum), with experimental bacterial coldwater disease but biologically relevant concentrations of deoxynivalenol do not impair the growth of F lavobacterium psychrophilum
Moldal et al.2018	2018	Atlantic salmon (Salmo salar)	DON	in-vivo	56	Pure	Feed	5500	2	50	12-month-old salmon	58	80.2	69.1	Satiation	3	Satiation	1387.5	0.495536	0.0394421	Toxins	Dietary Deoxynivalenol (DON) May Impair the Epithelial Barrier and Modulate the Cytokine Signaling in the Intestine of Atlantic Salmon (Salmo salar)
Koletsi et al.restrictive	2022	Rainbow trout (Oncorhynchus mykiss)	DON	in-vivo	40	Pure	Feed	1600	3	84	Fingerlings	8.10111	35.4643	21.7827	Restrictively	2	12g/kgMBW, feed intake was adjusted in order all tanks received the same amount of toxin	572.287	0.51097	0.0375322	Toxins	Time- and dose-dependent effects of dietary deoxyni-valenol (DON) in rainbow trout (Oncorhynchus mykiss) at organism and tissue level
Koletsi et al.restrictive	2022	Rainbow trout (Oncorhynchus mykiss)	DON	in-vivo	40	Natural	Feed	1200	3	84	Fingerlings	7.44111	35.5	21.4706	Restrictively	2	12g/kgMBW, feed intake was adjusted in order all tanks received the same amount of toxin	585.391	0.522671	0.0292123	Toxins	Time- and dose-dependent effects of dietary deoxyni-valenol (DON) in rainbow trout (Oncorhynchus mykiss) at organism and tissue level
Koletsi et al.satiation	2022	Rainbow trout (Oncorhynchus mykiss)	DON	in-vivo	15	Pure	Feed	1600	3	63	Juveniles	36.0554	63.0952	49.5753	Satiation	2	Satiation	526.827	1.67247	0.0539774	Toxins	Time- and dose-dependent effects of dietary deoxyni-valenol (DON) in rainbow trout (Oncorhynchus mykiss) at organism and tissue level
Koletsi et al.satiation	2022	Rainbow trout (Oncorhynchus mykiss)	DON	in-vivo	15	Natural	Feed	1200	3	63	Juveniles	35.5373	61.873	48.7052	Satiation	2	Satiation	497.526	1.57945	0.0389145	Toxins	Time- and dose-dependent effects of dietary deoxyni-valenol (DON) in rainbow trout (Oncorhynchus mykiss) at organism and tissue level
